# Supplementary material for: Oncometabolite D-2-Hydroxyglutarate enhances gene silencing through inhibition of specific H3K36 histone demethylases
Source: eLife journal article supplement (doi:10.7554/elife.22451), 2017-03-27
Supplement: figures [file elife-22451-figures-v2.pdf]

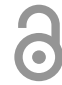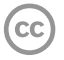

---

## Figures and figure supplements

Oncometabolite D-2-Hydroxyglutarate enhances gene silencing through inhibition of specific H3K36 histone demethylases

**Ryan Janke *et al***

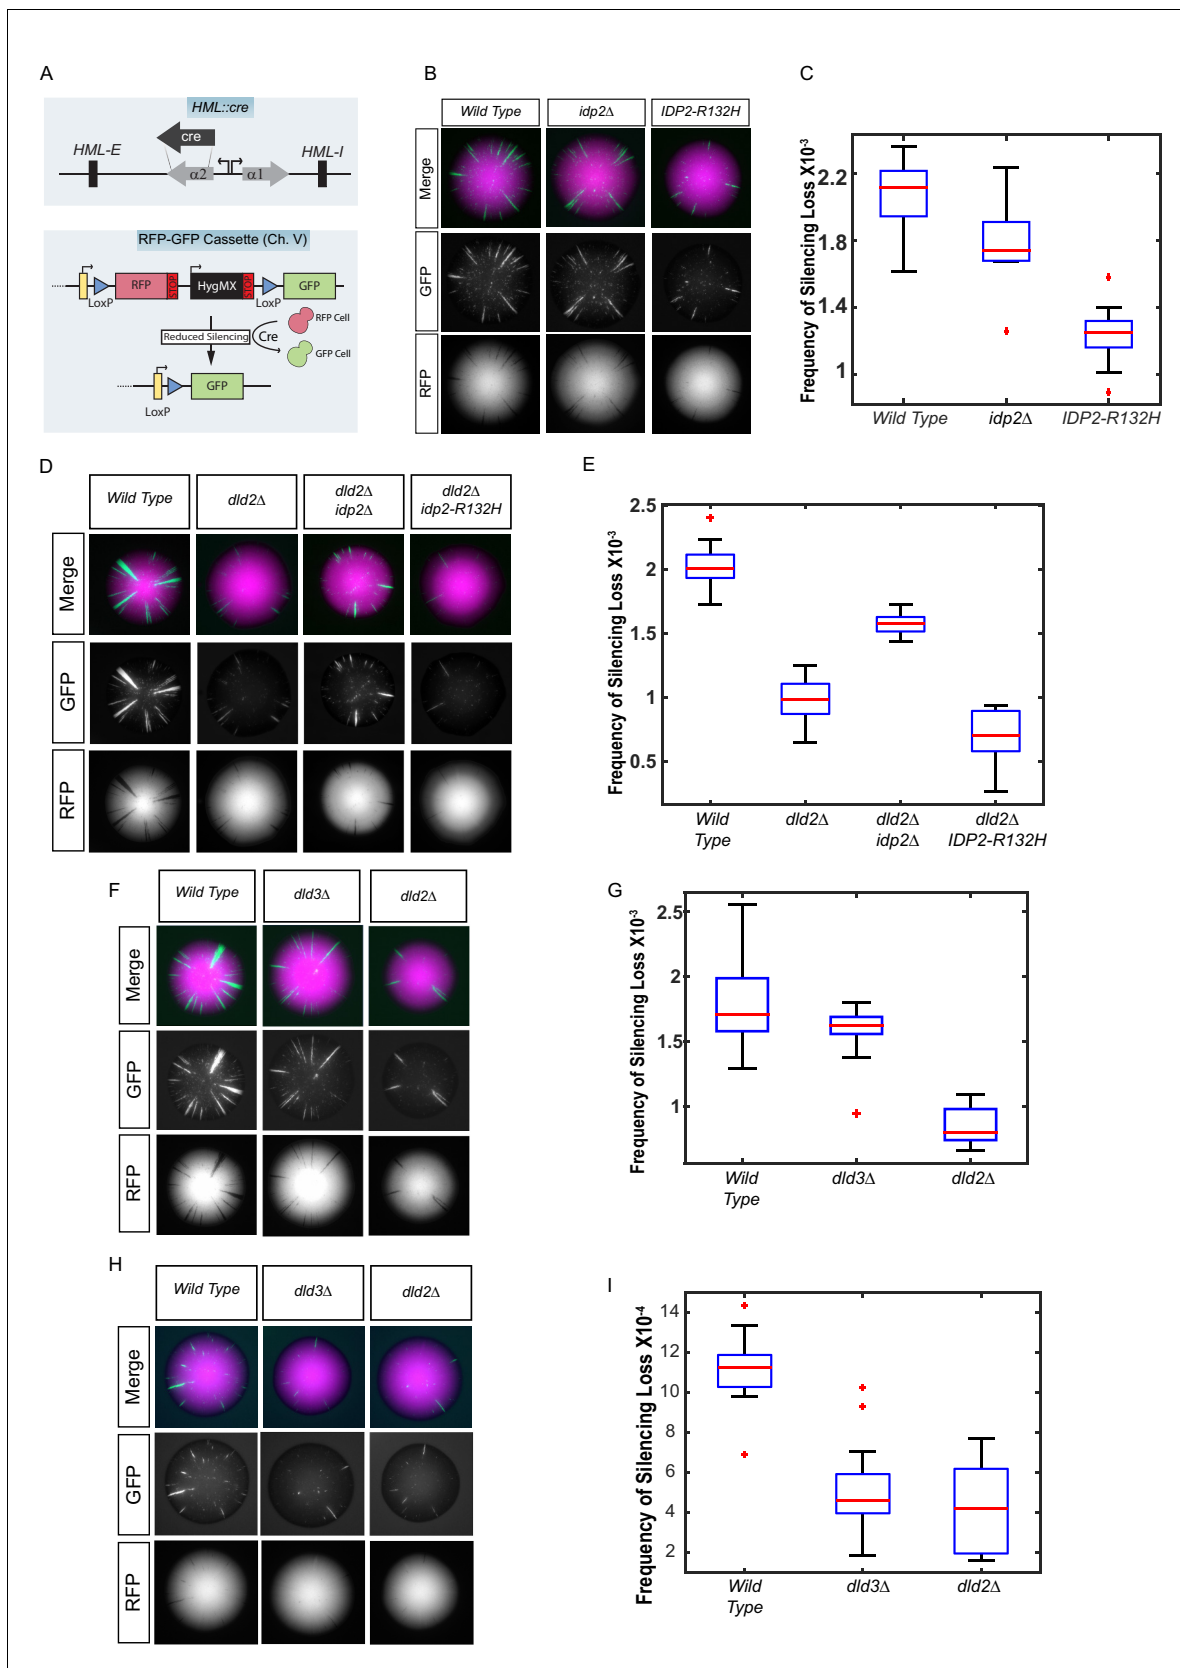

**Figure 1.** Yeast versions of tumor-associated isocitrate dehydrogenase mutation caused increased stabilization of heterochromatin. **(A)** Illustration of the CRASH (Cre reported altered states of heterochromatin) assay used to measure the strength of heterochromatic gene silencing at the *HML* locus. Figure 1 continued on next page

## Figure 1 continued

(B) Images of colonies with the CRASH reporter assay that were wild type (JRY10791), *idp2Δ* (JRY10732), or *IDP2-R132H* (JRY10731). (C) Box plots of the average frequency of loss-of-silencing events from mutants in panel B calculated using MORPHE (Liu et al., 2016). (D) Representative colony images of CRASH reporter strains with wild type (JRY10790) or mutant *dld2Δ* (JRY10733), *dld2Δ idp2Δ* (JRY10735), or *dld2Δ IDP2-R132H* (JRY10734). (E) The frequency of silencing loss from mutants in panel D. (F) Representative colony images of CRASH reporter strains with wild type (JRY10790) or mutant *dld3Δ* (JRY10752) and *dld2Δ* (JRY10733). (G) Plots of the frequency of silencing loss from mutants in panel F. (H) Images of colonies with the CRASH reporter assay that were wild type (JRY10790), *dld2Δ* (JRY10733), or *dld3Δ* (JRY10752). Colonies were grown on CSM-Trp-glucose agar plates for 7 days at 30°C. Representative images show the merged and separate GFP and RFP channels. (I) Plots of the frequency of silencing loss from mutants in panel H.

DOI: [10.7554/eLife.22451.002](https://doi.org/10.7554/eLife.22451.002)

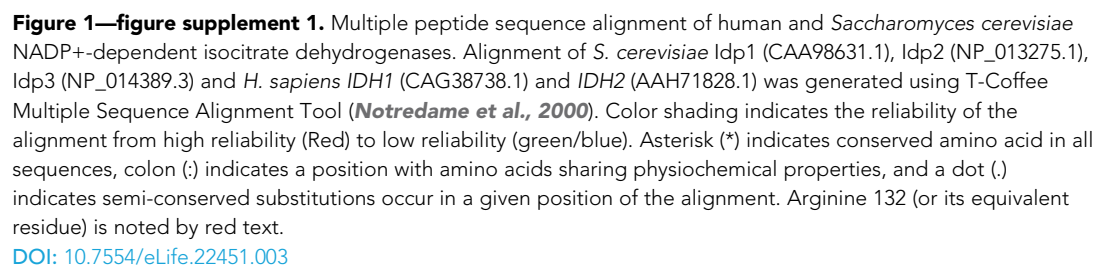

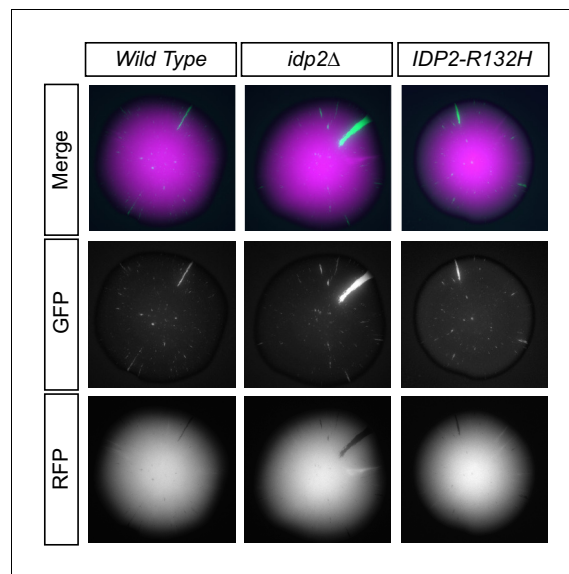

**Figure 1—figure supplement 2.** Images of colonies with the CRASH reporter assay and *idp2Δ* or *IDP2-R132H* mutations grown on glucose. Cells were plated on CSM-Trp glucose agar plates and grown for 7 days at 30°C. Tops of colonies were imaged in GFP and RFP channels. The RFP and GFP channels for a single representative image of each strain are shown separately and as a merged image.

DOI: [10.7554/eLife.22451.004](https://doi.org/10.7554/eLife.22451.004)

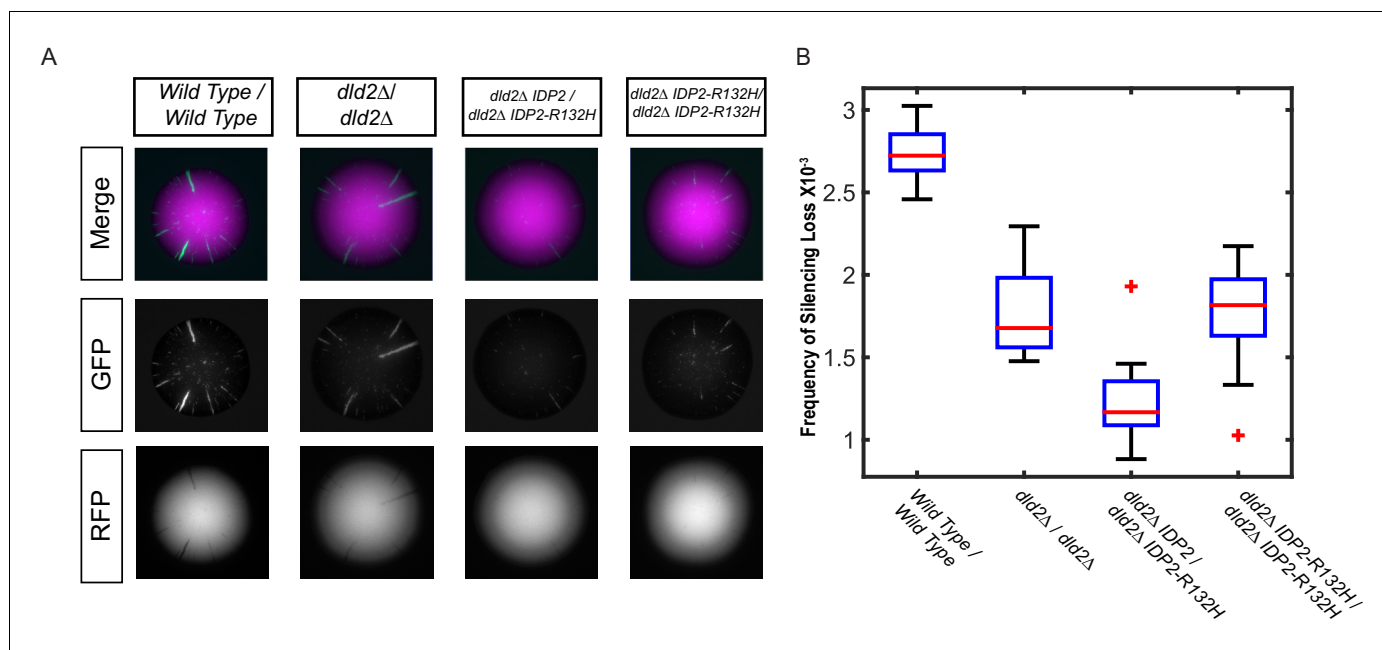

**Figure 2.** The silencing phenotype of *IDP2-R132H* was dominant. **(A)** Images of diploid colonies with the CRASH reporter assay. The diploid strains have *CRE* inserted at both copies of *HML* and two copies of the CRASH RFP-GFP reporter cassette and were wild type (JRY10750), *dld2Δ/dld2Δ* (JRY10749), *dld2Δ/dld2Δ IDP2/IDP2-R132H* (JRY10751), or *dld2Δ/dld2Δ IDP2-R132H/IDP2-R132H* (JRY10748). Cells were plated on CSM-Trp glycerol agar plates and imaged after 7 days. **(B)** Plots of the frequency of silencing loss from mutants in panel A were calculated using MORPHE.

DOI: [10.7554/eLife.22451.005](https://doi.org/10.7554/eLife.22451.005)

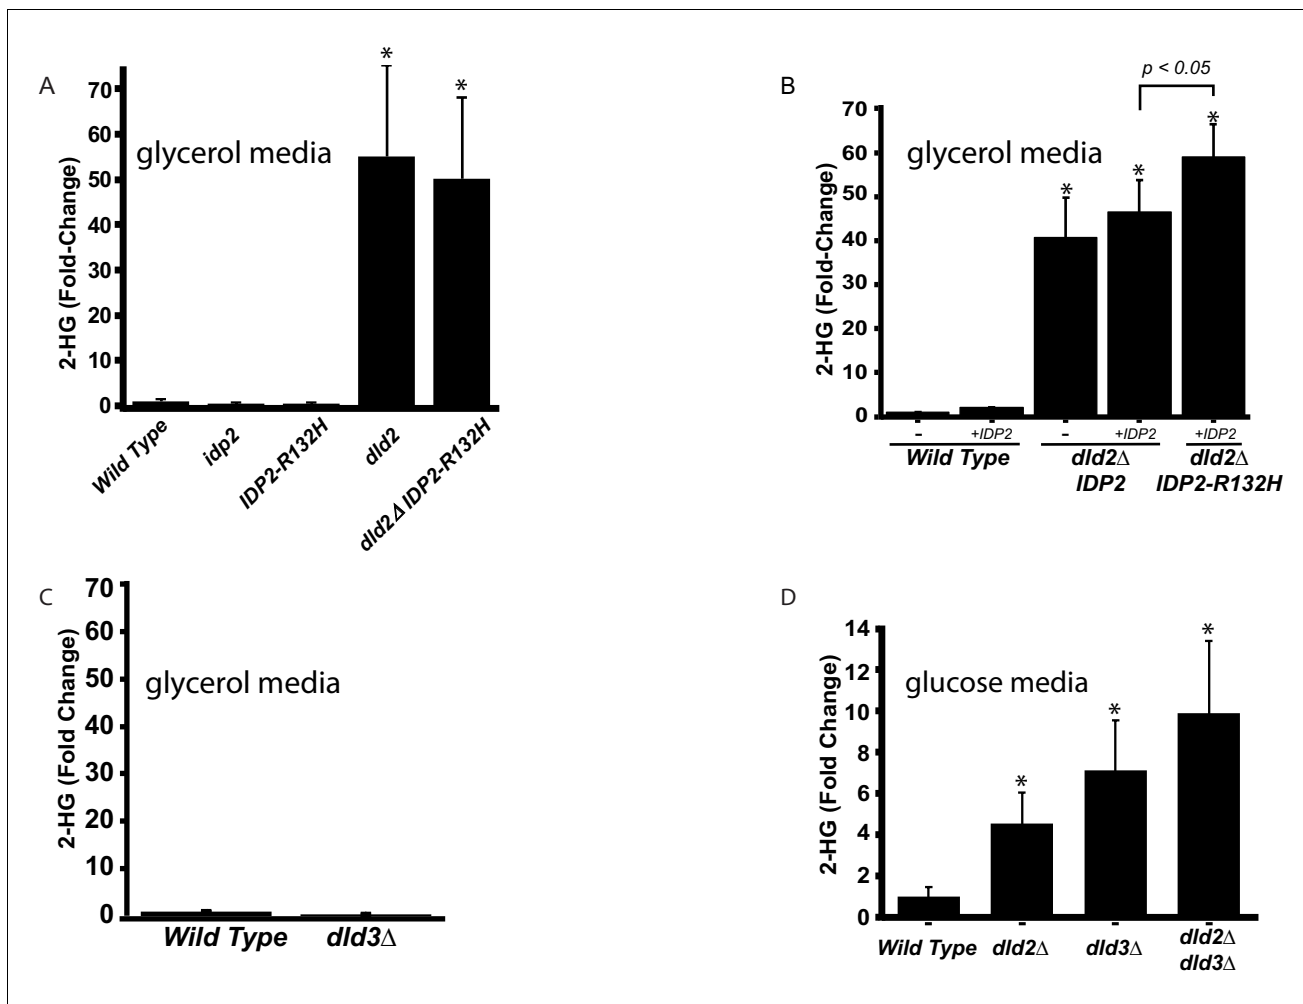

**Figure 3.** D2-HG levels increase in *dld*- and *idp* mutants. (A) Plot of the average fold change from wild type (JRY10790) in levels of D-2-hydroxyglutarate from metabolite extracts of *dld2Δ* (JRY10733), *idp2Δ* (JRY10732), *IDP2-R132H* (JRY10731), and *dld2Δ IDP2-R132H* (JRY10734) mutant strains measured by LC-mass spectrometry. (B) Plot of the average fold change from wild type in levels of D-2-hydroxyglutarate from metabolite extracts from wild type (JRY10790), *dld2Δ* (JRY10733) and *dld2Δ IDP2-R132H* (JRY10734) cells transformed with the empty vector pRS315 (denoted as -) or plasmid pJR3399 containing a wild-type copy of *IDP2* (denoted as +*IDP2*). (C) The average D-2-hydroxyglutarate levels from wild type (JRY10790) and *dld3Δ* (JRY10752) strains were measured and plotted as in part A. (D) The average D-2-hydroxyglutarate levels from wild type (JRY10790), *dld2Δ* (JRY10733), *dld3Δ* (JRY10752), and *dld2Δ dld3Δ* (JRY10753) mutants grown in minimal medium with 2% glucose were measured as in part A. For all panels, statistical analysis was performed using an unpaired, two-tailed (Student's) *t* test. Error bars show the standard error of the mean. Bars marked by an asterisk (\*) were statistically significantly different ( $p < 0.05$ ) from wild type.

DOI: [10.7554/eLife.22451.006](https://doi.org/10.7554/eLife.22451.006)

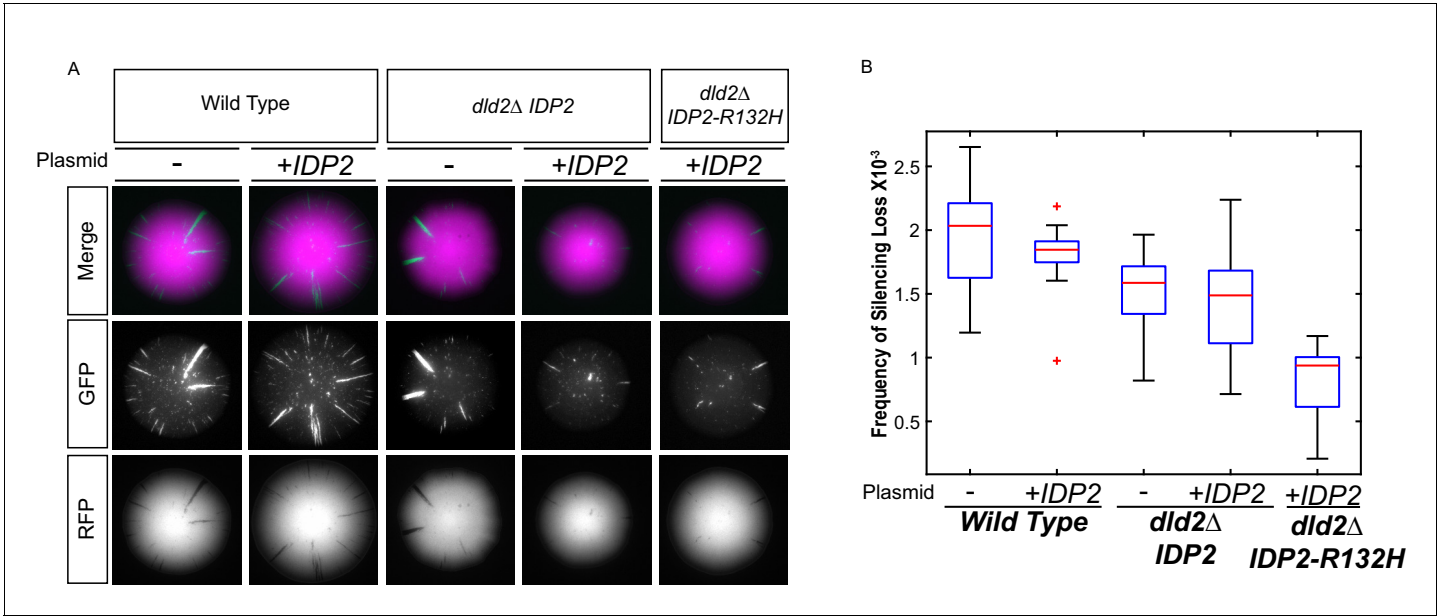

**Figure 3—figure supplement 1.** Increased D2-HG levels correspond to an increase in silencing. (A) Images of colonies with the CRASH reporter assay from wild type (JRY10790), *dld2Δ* (JRY10733) and *dld2Δ IDP2-R132H* (JRY10734) cells transformed with the empty vector pRS315 (denoted as '-') or plasmid pJR3399 containing a copy of wild-type *IDP2* (denoted as +*IDP2*). (B) Plots of the frequency of loss-of-silencing events from mutants in panel A calculated using MORPHE.

DOI: 10.7554/eLife.22451.007



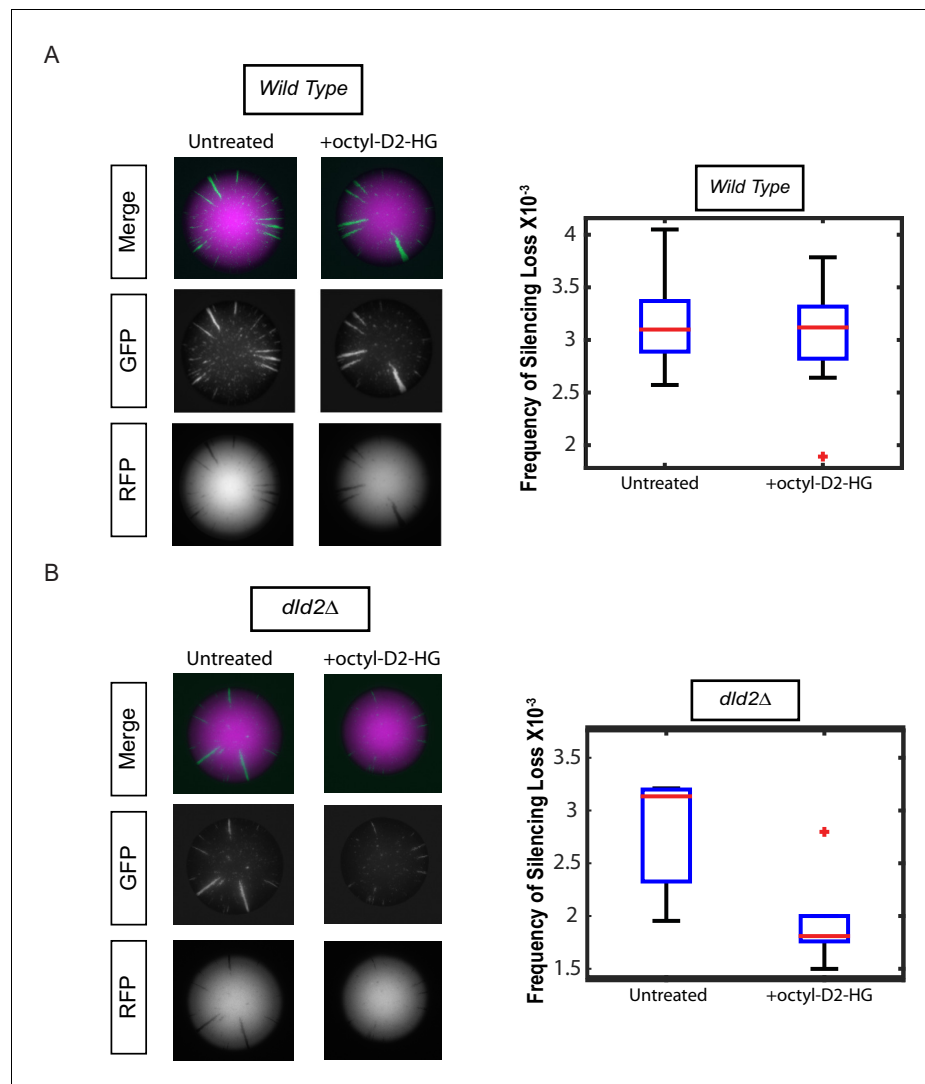

**Figure 4.** Treatment with cell-permeable octyl-D2-HG increased heterochromatin silencing. **(A)** Images of wild type (JRY10790) CRASH assay reporter colonies that were grown on CSM-Trp 3% Glycerol (untreated) or with 100  $\mu$ M octyl-D2-HG added to the medium (Left Panel). Plots of the frequency of silencing loss calculated using MORPHE (Right Panel). **(B)** Images of *dld2Δ* (JRY10733) CRASH assay reporter colonies that were grown on CSM-Trp 3% Glycerol (untreated) or with 100  $\mu$ M octyl-D2-HG added to the medium (Left Panel). Plots of the frequency of silencing loss from colonies calculated using MORPHE. The data in **Figure 4A and B** were from independent experiments conducted on different days with different batches of media. MORPHE-based comparisons should be restricted to experiments performed in parallel at the same time (Liu et al., 2016).

DOI: [10.7554/eLife.22451.008](https://doi.org/10.7554/eLife.22451.008)

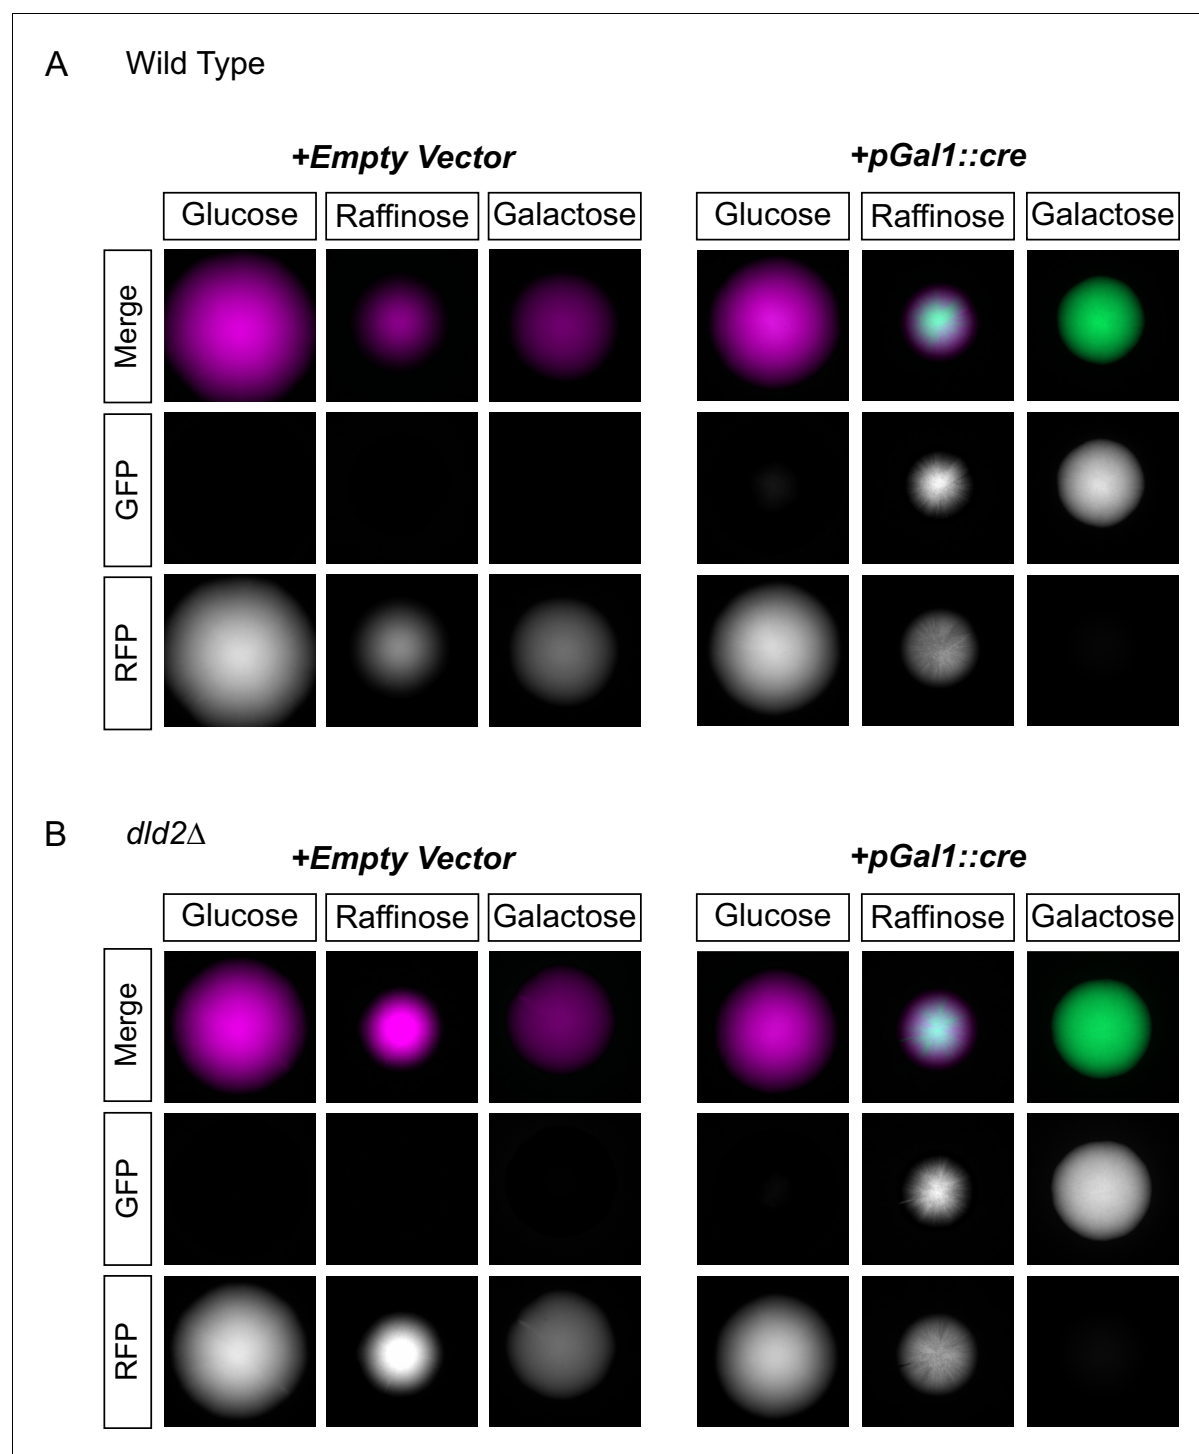

**Figure 5.** D2HG did not enhance a locus-specific gene repression mechanism. (A) Images of colonies of CRASH reporter strains with wild-type *HML* (JRY10757) and either a pRS413 empty vector (left panels) or a vector with *cre* expressed from the *GAL1* promoter (pSH62) (right panels). Cells were plated on CSM-His-Trp with the indicated carbon source and grown for 7 days at 30°C. Representative images show the merged and separate GFP and RFP channels. (B) The same experiment as in part A was performed in a strain containing a *dld2* deletion (JRY10758).

DOI: [10.7554/eLife.22451.009](https://doi.org/10.7554/eLife.22451.009)

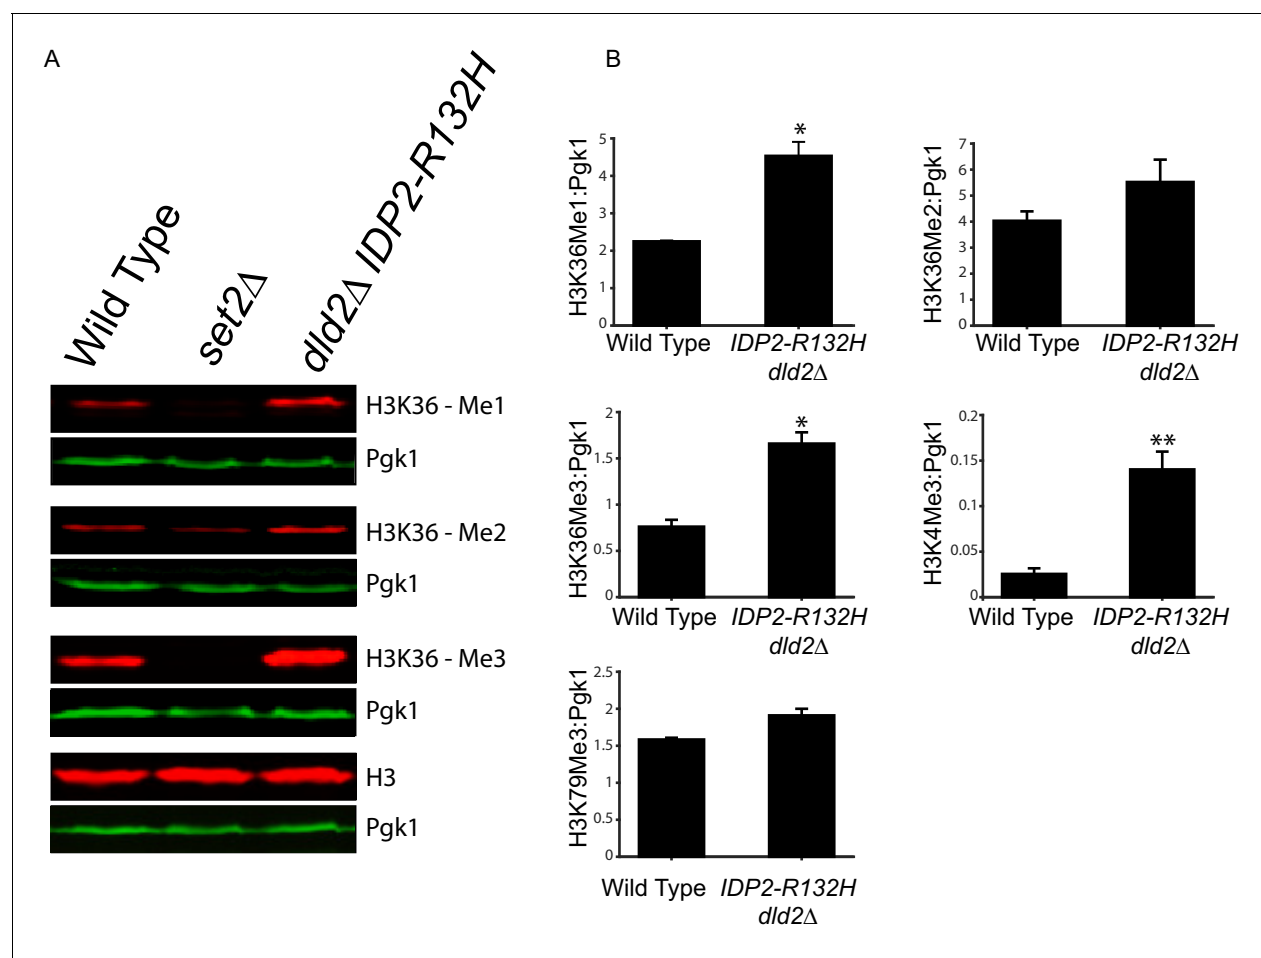

**Figure 6.** Bulk histone methylation increased in strains with high levels of D2-HG. (A) Immuno-blot analysis of H3 histone methylation states from wild type (JRY10790), *set2Δ* (JRY10746), and *dld2Δ IDP2-R132H* (JRY10734) mutants. The upper panel of each set shows immuno-blot signals generated from antibodies against mono-, di-, or trimethyl H3K36, and total H3. The lower panel of each set shows a loading control immuno-blot signal generated from an antibody against Pgk1 from the same membrane as the panel above it. (B) Fluorescent immuno-blot signals from panel A and from **Figure 6—figure supplement 1** were imaged and quantified using LI-COR Odyssey. The value of each methylation mark normalized to total H3 was calculated and the average of measurements from three independent clones, which serve as biological replicates, was plotted. The error bars represent standard error of the mean. Indicated p-values were generated by an unpaired, two-tailed (Student's) *t* test (\**p* ≤ 0.01, \*\**p* ≤ 0.005).

DOI: [10.7554/eLife.22451.010](https://doi.org/10.7554/eLife.22451.010)

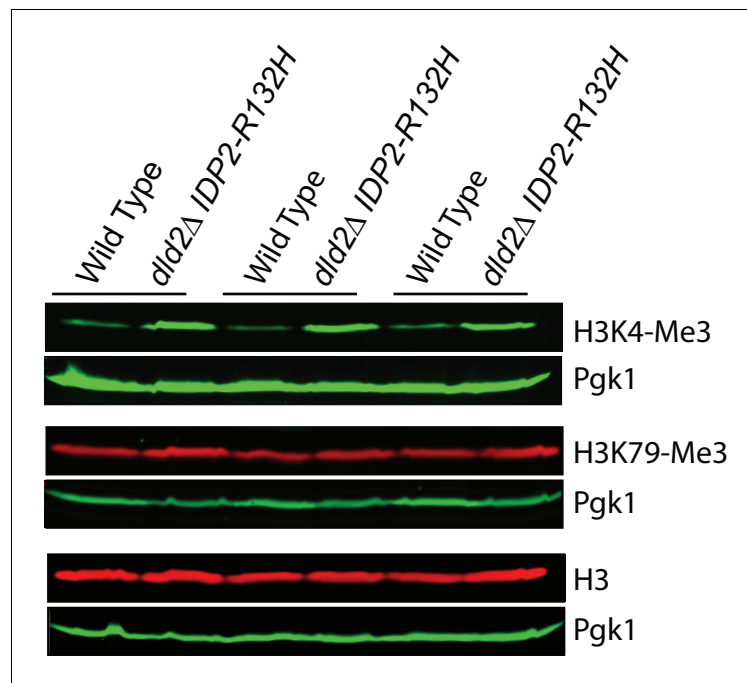

**Figure 6—figure supplement 1.** Immuno-blot analysis of H3 histone methyl states from wild type (JRY10790) and *dld2Δ IDP2-R132H* mutants (JRY10734). The upper panel of each set shows immunoblot signals generated from antibodies against trimethyl H3K4, H3K79, and total H3, as imaged on a LI-COR Odyssey. The lower panel of each set shows a loading control immuno-blot signal generated from an antibody against Pgk1 from the same membrane as the panel above it.

DOI: [10.7554/eLife.22451.011](https://doi.org/10.7554/eLife.22451.011)

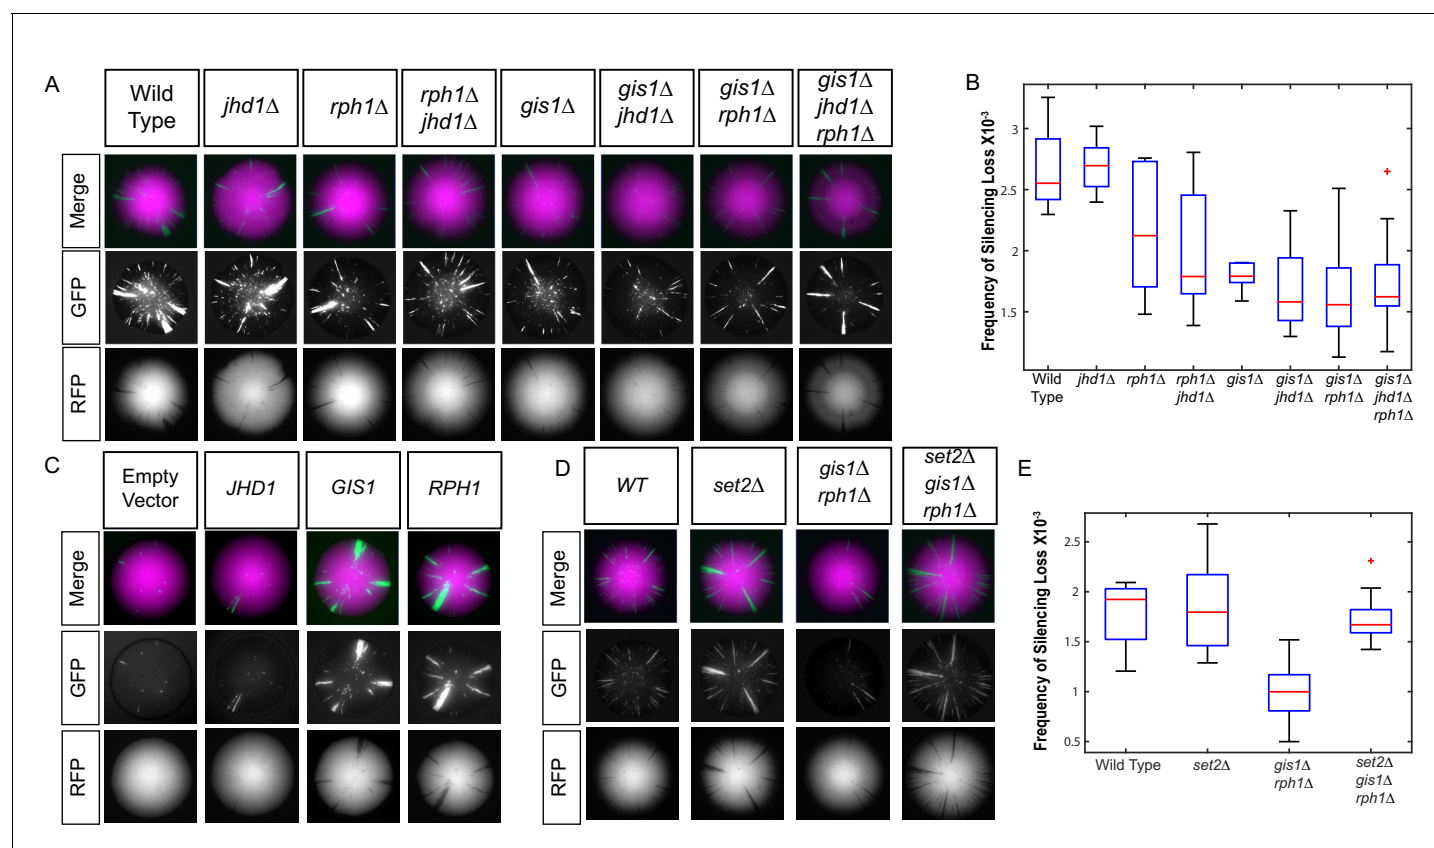

**Figure 7.** Loss of H3K36 demethylases Gis1 and Rph1 increased heterochromatin stability. (A) Images of CRASH assay reporter colonies that are wild type (JRY10790) or contain mutations in H3K36 demethylases. (B) Plots of the frequency of loss-of-silencing events from mutants in panel A calculated using MORPHE. (C) Images of CRASH assay reporter colonies (JRY10790) transformed with plasmids encoding Jumonji-domain demethylases overexpressed from a galactose-inducible promoter. The colonies were grown on agar plates containing 2% galactose. (D) Images of CRASH reporter strains with *set2Δ*, *gis1Δ*, and *rph1Δ* mutations. (E) Plots of the frequency of loss-of-silencing events from mutants in panel D calculated using MORPHE. DOI: 10.7554/eLife.22451.012

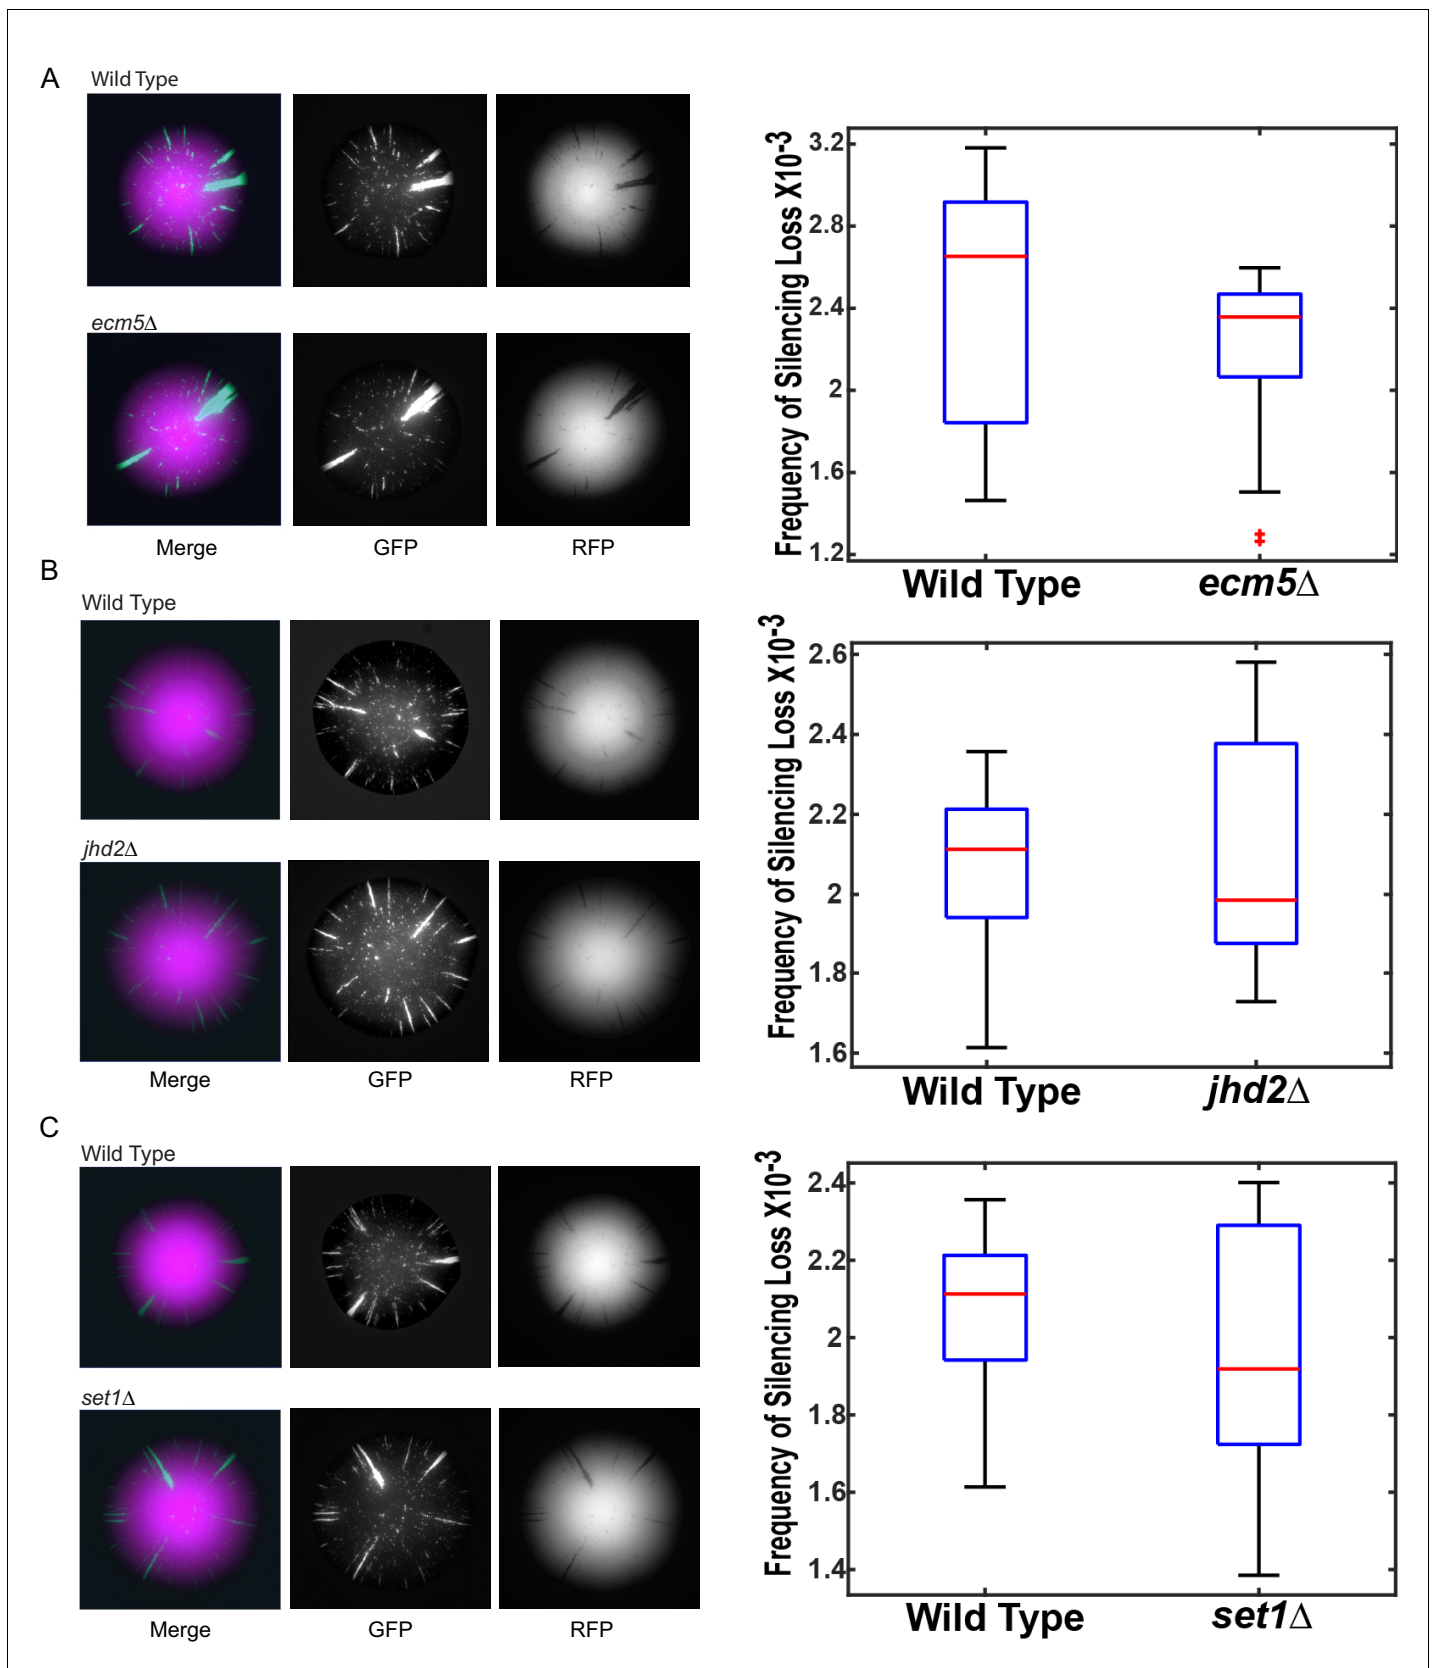

**Figure 7—figure supplement 1.** Images of colonies with the CRASH reporter assay and *emc5Δ*, *jhd2Δ*, and *set1Δ* mutations grown on glycerol. Wild-type strains (JRY10790) and strains deleted for *emc5Δ* (JRY10754) (A), *jhd2Δ* (JRY10755) (B), or *set1Δ* (JRY10756) (C) were grown on CSM-Trp-glycerol

Figure 7—figure supplement 1 continued on next page

*Figure 7—figure supplement 1 continued*

agar plates for 7 days at 30°C. Representative images show the merged and separate GFP and RFP channels. Plots of the frequency of silencing loss from mutants in each panel were calculated using MORPHE. For all panels, statistical analysis comparing wild type to the indicated mutant was performed using an unpaired, two-tailed (Student's) *t* test. No statistically significant ( $p < 0.05$ ) differences were observed.

DOI: [10.7554/eLife.22451.013](https://doi.org/10.7554/eLife.22451.013)

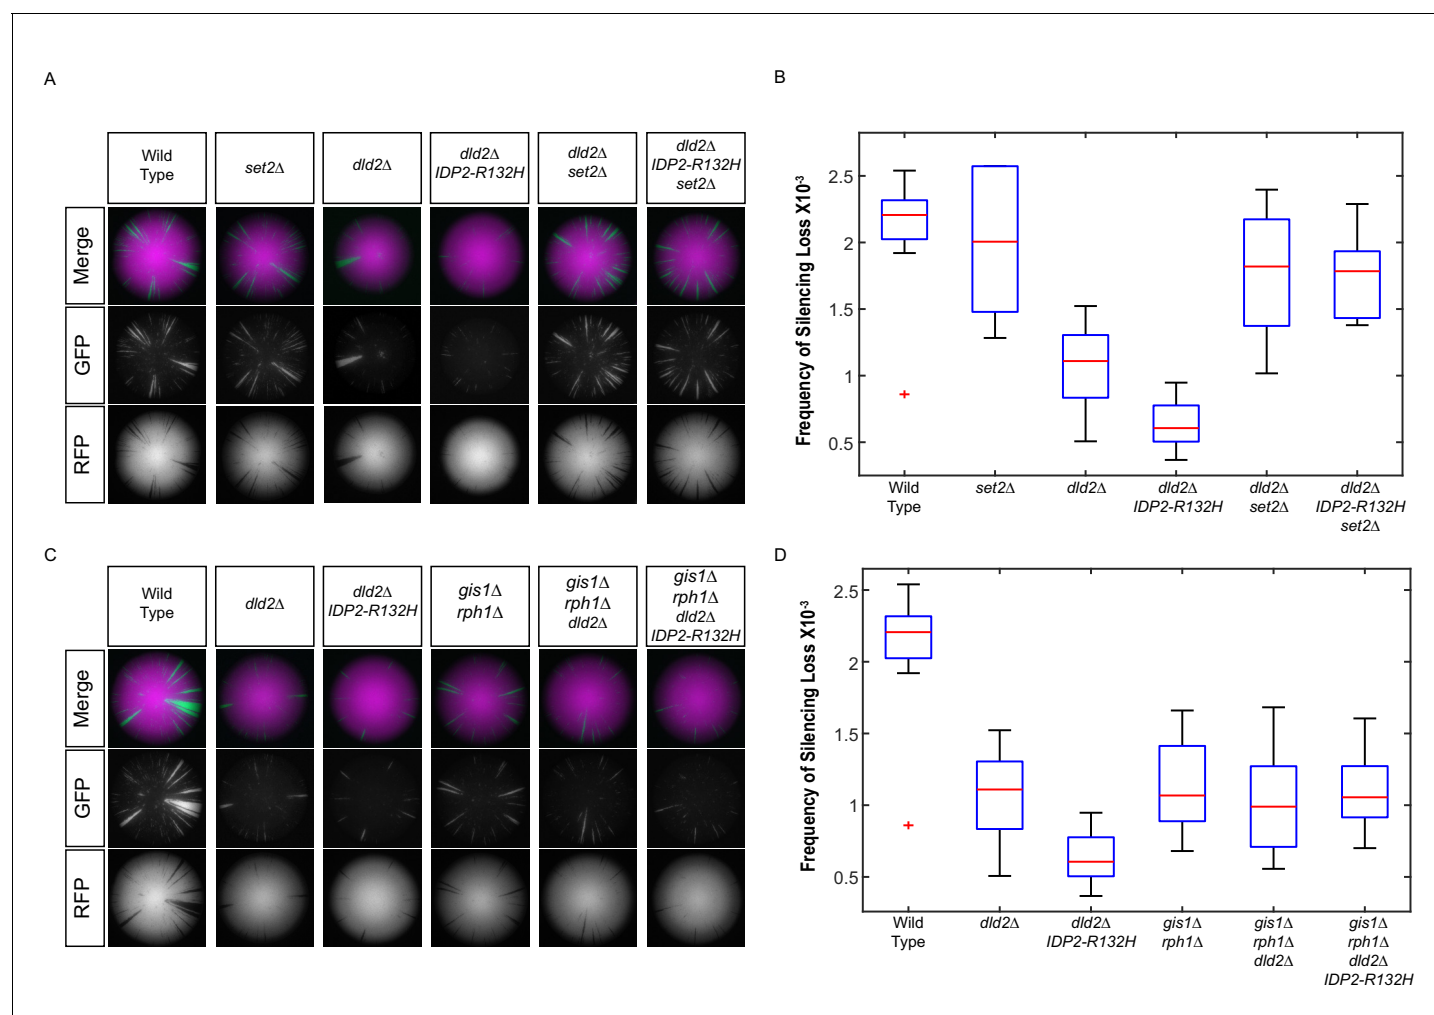

**Figure 8.** *IDP2-R132H* and *dld2Δ* silencing phenotypes depends on H3K36 hypermethylation. (A) Images of CRASH assay reporter colonies that are wild type (JRY10790) or mutant *dld2Δ* (JRY10733), *dld2Δ IDP2-R132H* (JRY10734), *set2Δ* (JRY10746), *dld2Δ set2Δ* (JRY10794), or *dld2Δ IDP2-R132H set2Δ* (JRY10795). (B) Plots of the frequency of loss-of-silencing events from mutants in panel A calculated using MORPHE. (C) Images of CRASH assay reporter colonies. The same strains as in panel A were used with the addition of *gis1Δ rph1Δ* (JRY10742), *gis1Δ rph1Δ dld2Δ* (JRY10792), and *gis1Δ rph1Δ dld2Δ IDP2-R132H* (JRY10793). (D) Plots of the frequency of loss-of-silencing events from mutants in panel C calculated using MORPHE. The experiments in panel A and panel C were performed together, and the same batches of colony images were used in MORPHE analysis for wild type, *dld2Δ*, and *dld2Δ IDP2-R132H* (panels B and D).

DOI: 10.7554/eLife.22451.014
